# Supplementary material for: T Cells in Multisystem Inflammatory Syndrome in Children (MIS-C) Have a Predominant CD4+ T Helper Response to SARS-CoV-2 Peptides and Numerous Virus-Specific CD4− CD8− Double-Negative T Cells
Source: Int J Mol Sci. 2022 Jun 29;23(13):7219. doi: 10.3390/ijms23137219 (PMC9266459; doi:10.3390/ijms23137219)
Supplement: Supplementary file 1 [file ijms-23-07219-s001.zip › ijms-1788211-supplementary.pdf]

Supplementary materials

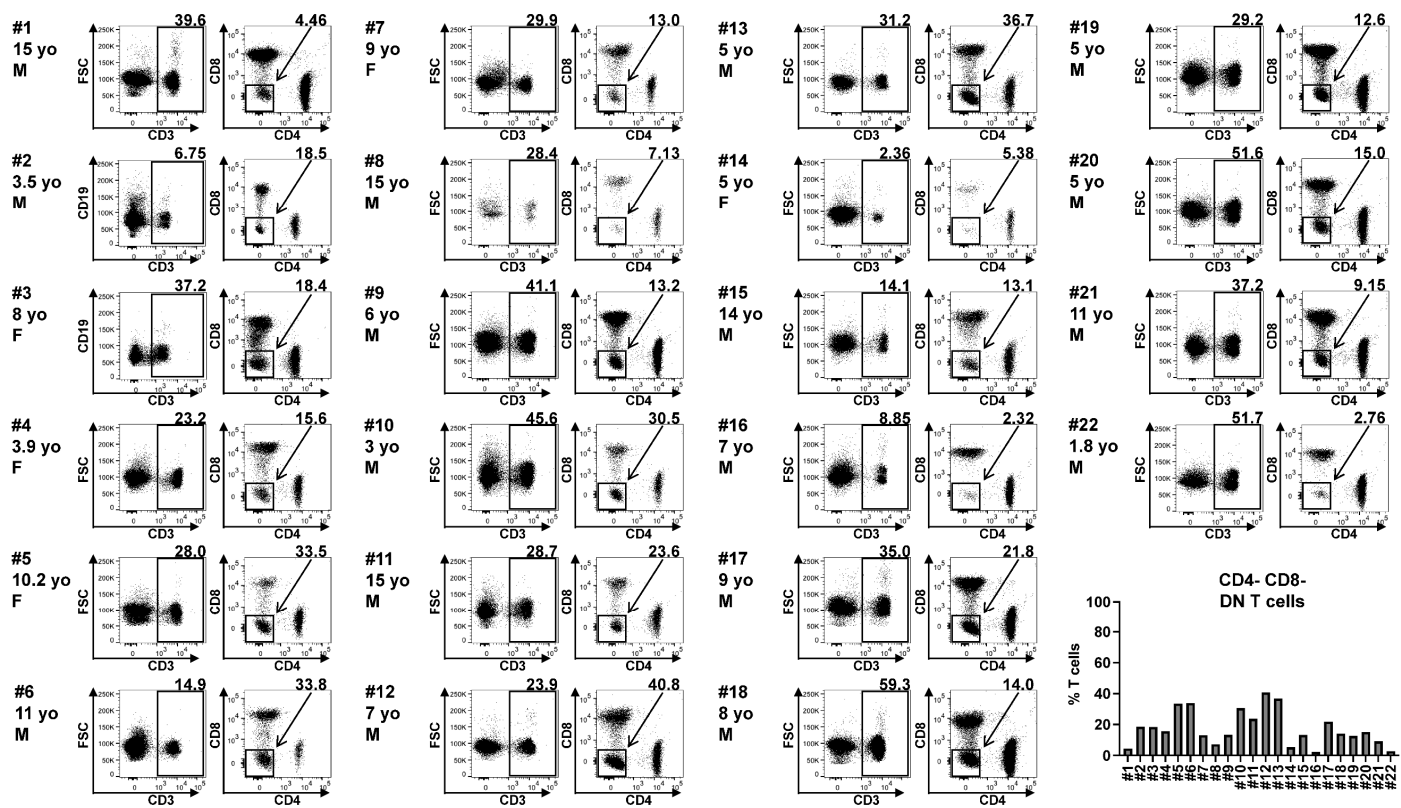

**Supplementary Figure S1. CD4- CD8- DN T cells in subacute MIS-C subjects.** FACS plots showing the gating of CD4- CD8- DN T cells. Percentage of the gated population is indicated at the top right corner of the plots. DN T cells were numerous (median 14.5%; Q1 – Q3: 8.65 – 25.3%) in the total T cell population in subacute MIS-C subjects.

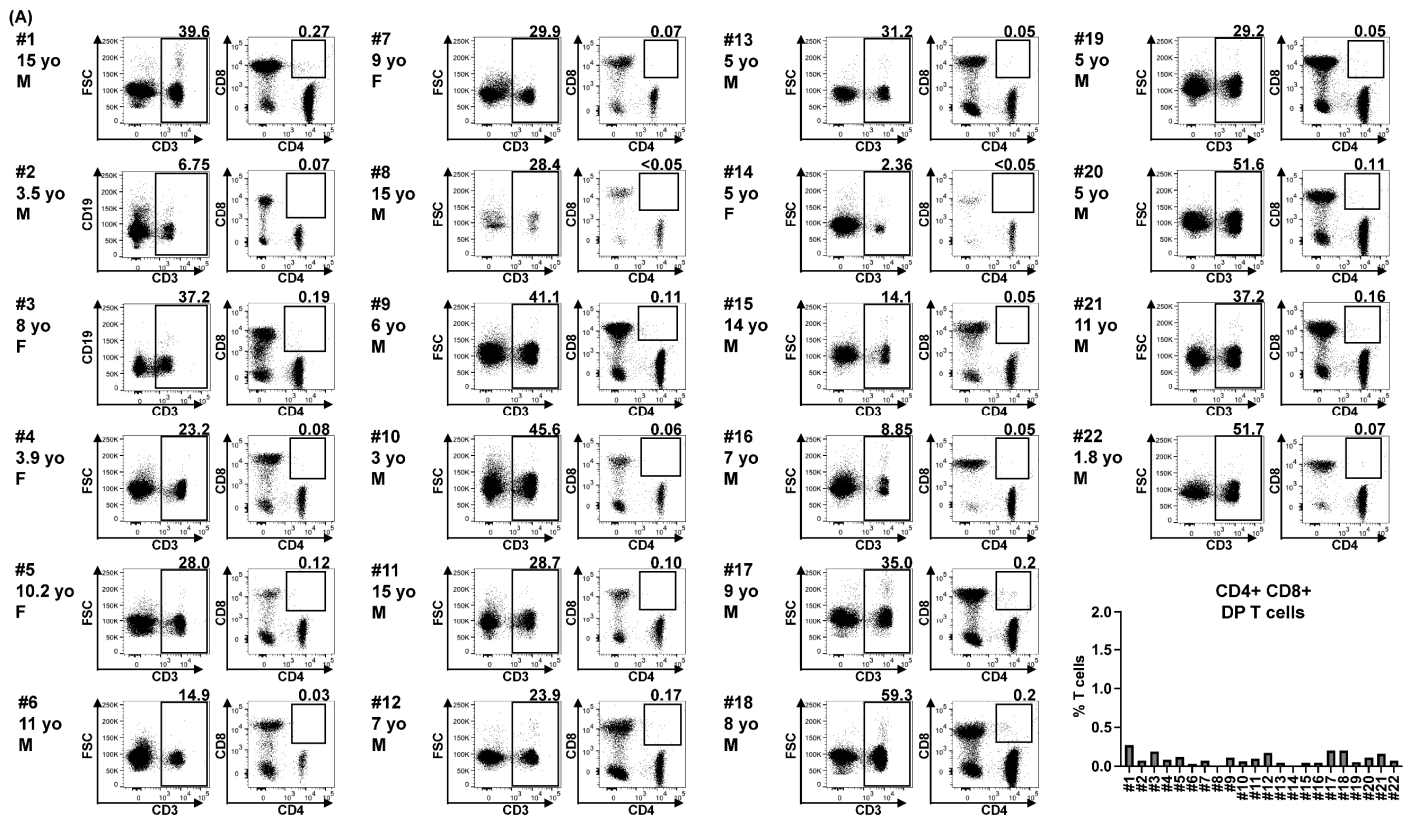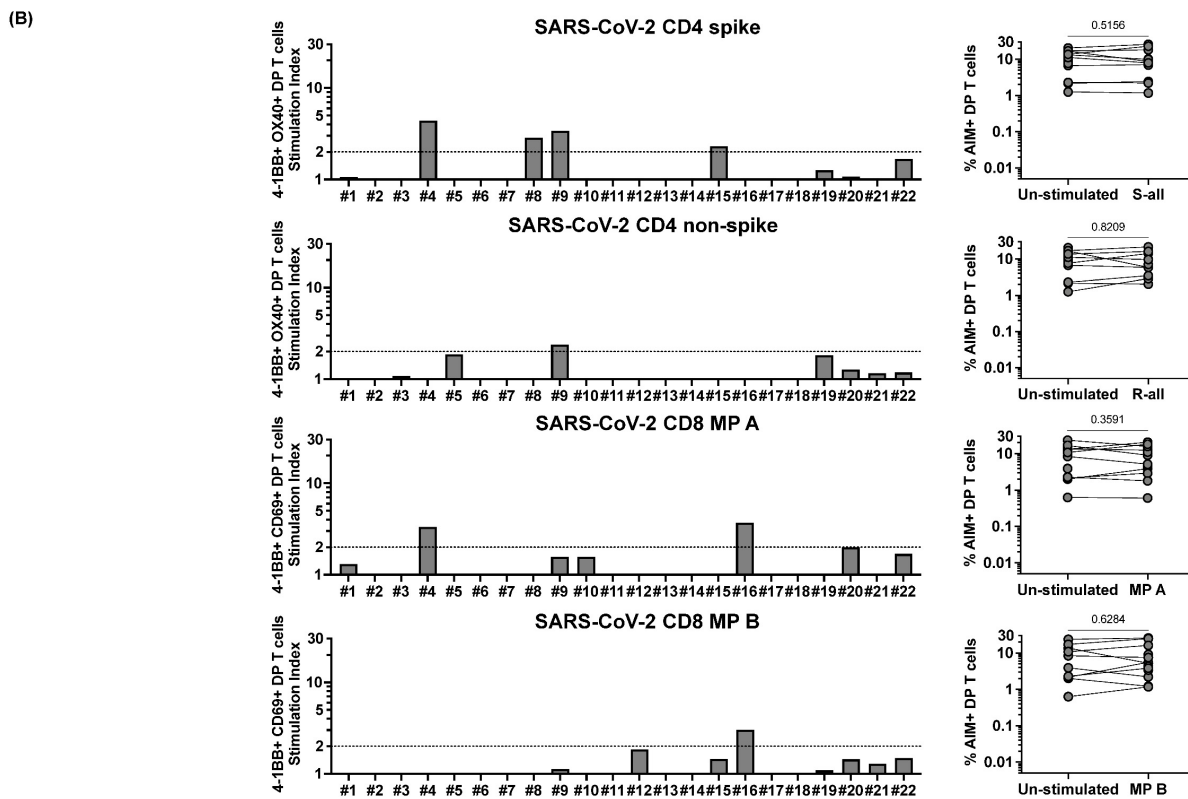

**Supplementary Figure S2. CD4+ CD8+ double positive (DP) T cells in subacute MIS-C subjects.**

(A) FACS plots showing the gating of CD4+ CD8+ DP T cells. Percentage of the gated population is indicated at the top right corner of the plots. DP T cells were detectable in a low range (median

0.0785%; Q1 – Q3: 0.0478 – 0.163%) in the total T cell population in subacute MIS-C subjects. **(B)** DP T cell activation in response to SARS-CoV-2 peptide megapool stimulations. SI of AIM+ DP T cells from each individual subject were shown. One (#4) of the 22 subjects showed DP T cell responses to SARS-CoV-2 CD4 and CD8 peptide megapools concurrently. Three (#8, 9, 15) and one (#16) of the 22 subjects showed response to SARS-CoV-2 CD4 and CD8 peptide megapools, respectively. Seventeen (#1 – 3, 5 – 7, 10 – 14, #17 – 22) showed no measurable response from DP T cells. Each symbol represents the data derived from individual subject. Comparisons of the percentage of AIM+ T cells between un-stimulated control and peptide megapool-stimulated cell cultures were tested by Wilcoxon signed rank test.

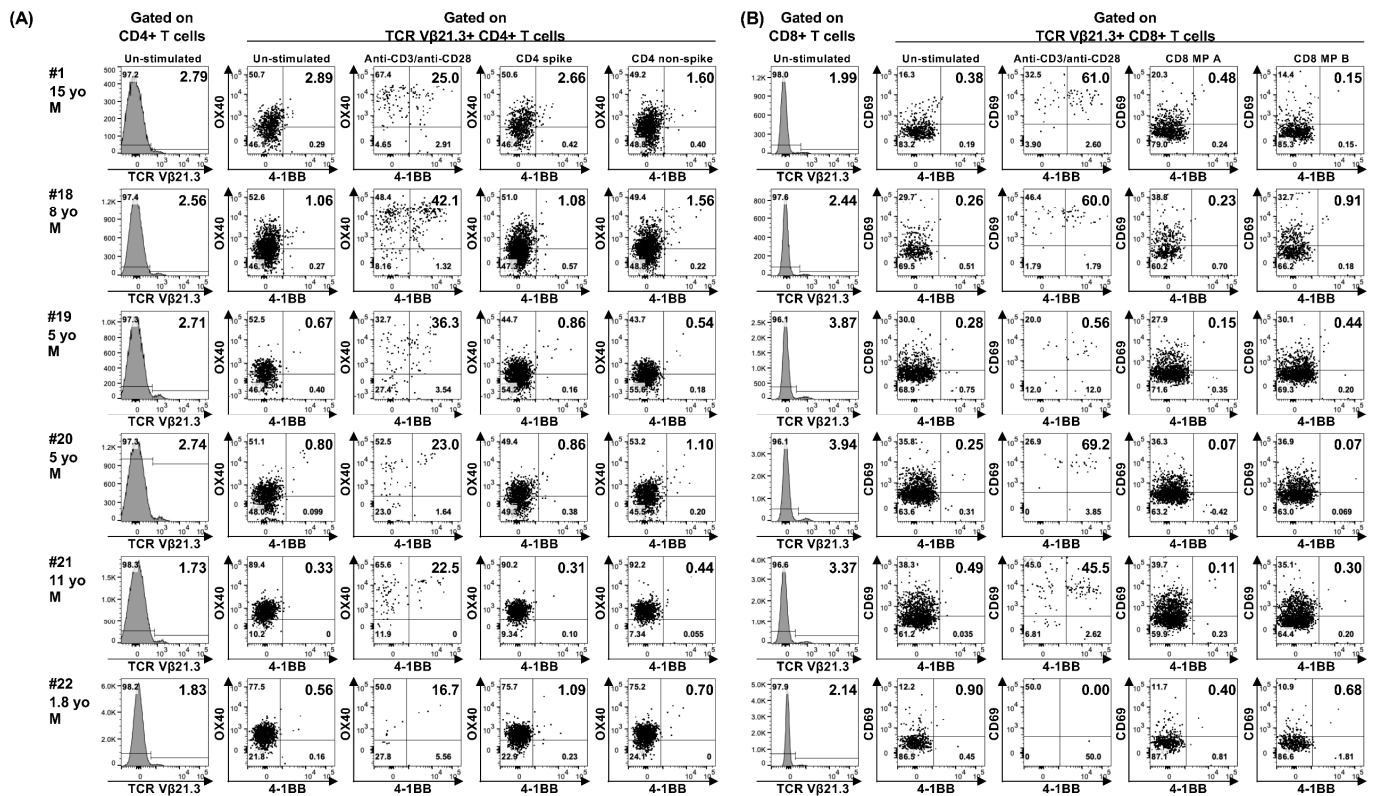

**Supplementary Figure S3. TCR Vβ21.3+ CD4+ and CD8+ T cells in subacute MIS-C subjects.**

FACS plots showing the percentage of TCR Vβ21.3+ under **(A)** CD4+ and **(B)** CD8+ T cells and their expression of AIM under different stimulatory conditions. Percentage of the gated population is indicated at the top right corner of the plots.

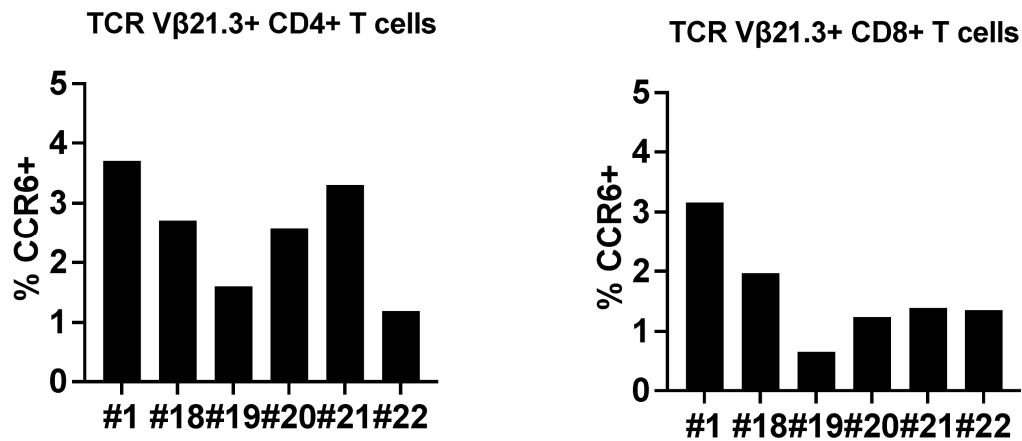

**Supplementary Figure S4. CCR6 expression on Vβ 21.3 CD4+ and CD8+ T cells**

The expression of the chemokine receptor CCR6 has been studied on Vβ 21.3 T cells by flow cytometry and found on the cell surface in a small percent of CD4+ T cells (left panel) and CD8+ T cells (right panel).
